# Supplementary material
Source: PubMed Central journal article supplement (PMC5657299)
Supplement: NIHMS880773-supplement-Supplemental_Data_File___doc___tif__pdf__etc__.pdf [file NIHMS880773-supplement-Supplemental_Data_File___doc___tif__pdf__etc__.pdf]

**Supplemental Table 1. Concurrent medications and peripheral eosinophil counts**

| <b>Patient No.</b>                                                                                                           | <b>Concurrent Medications<sup>a</sup></b>                                                                                                                                                                          | <b>Serum Eosinophils (Absolute Count, Cells/uL)<sup>b</sup></b> |
|------------------------------------------------------------------------------------------------------------------------------|--------------------------------------------------------------------------------------------------------------------------------------------------------------------------------------------------------------------|-----------------------------------------------------------------|
| 1                                                                                                                            | Vitamin C, oral antioxidant, cat's claw ( <i>uncaria tomentosa</i> ), enoxaparin, digestive enzymes, iodine, thymus replacement, zinc                                                                              | 90                                                              |
| 2                                                                                                                            | Sodium/potassium phosphate, pioglitazone/metformin, glimepiride, zolpidem, testosterone, valsartan/hydrochlorothiazide, metoprolol, niacin, rosuvastatin, multivitamin, aspirin, fish oil, glucosamine/chondroitin | 380                                                             |
| 3                                                                                                                            | Montelukast, omeprazole, trazodone, ropinirole, lamotrigine, fexofenadine/pseudoephedrine, multivitamin                                                                                                            | 190                                                             |
| 4                                                                                                                            | Aripiprazole, escitalopram, fexofenadine, ondansetron, zolpidem                                                                                                                                                    | 20                                                              |
| 5                                                                                                                            | Levothyroxine, atenolol, enalapril/hydrochlorothiazide, atorvastatin                                                                                                                                               | 320                                                             |
| 6                                                                                                                            | Temazepam, sulindac, finasteride, tamsulosin, aspirin, calcium, fish oil, multivitamin, fluorouracil                                                                                                               | 300                                                             |
| 7                                                                                                                            | Atorvastatin, oxybutynin, docusate, senna, polyethylene glycol, ibuprofen, sildenafil                                                                                                                              | 400                                                             |
| 8                                                                                                                            | Aspirin, metoprolol                                                                                                                                                                                                | 160                                                             |
| 9                                                                                                                            | Metoprolol, lisinopril, clopidogrel, simvastatin, bupropion, clonazepam, valproic acid, ipratropium bromide/albuterol, ciclesonide, iron, imodium, megestrol acetate                                               | 300                                                             |
| 10                                                                                                                           | None                                                                                                                                                                                                               | 40                                                              |
| 11                                                                                                                           | Almotriptan, alprazolam, amitriptyline, vitamin D3, eletriptan, topiramate, zinc                                                                                                                                   | 320                                                             |
| 12                                                                                                                           | Aspirin, vitamin D3, hydrochlorothiazide, levothyroxine, rosuvastatin, ranitidine, trandolapril, sulfamethoxazole/trimethoprim                                                                                     | 340                                                             |
| 13                                                                                                                           | Sulfamethoxazole/trimethoprim, pantoprazole, mesalamine, multivitamin, fluticasone/salmeterol, tiotropium, atorvastatin, silodosin, ramipril                                                                       | 700                                                             |
| 14                                                                                                                           | Oxycodone, colace, senna, fentanyl                                                                                                                                                                                 | 500                                                             |
| 15                                                                                                                           | Atorvastatin, alprazolam, vitamin C                                                                                                                                                                                | 500                                                             |
| 16                                                                                                                           | Alprazolam, pantoprazole, ondanestron, duloxetine, bisacodyl                                                                                                                                                       | 200                                                             |
| <p><b>Legend:</b><br/> <sup>a</sup>At time of clinical presentation<br/> <sup>b</sup>Serum eosinophils at time of biopsy</p> |                                                                                                                                                                                                                    |                                                                 |

**Supplemental Table 2. Summary and literature review of biopsy-proven lichenoid dermatitis induced by treatment with anti-PD-1/PD-L1**

| Study                         | Tumor type                                                                                             | Oncologic agent                                     | Total patients with cutaneous irAEs | Total cutaneous irAE specimens                | Proportion of biopsies that were lichenoid | Immunohistochemistry                                                                                                                                                                                                                                                                      |
|-------------------------------|--------------------------------------------------------------------------------------------------------|-----------------------------------------------------|-------------------------------------|-----------------------------------------------|--------------------------------------------|-------------------------------------------------------------------------------------------------------------------------------------------------------------------------------------------------------------------------------------------------------------------------------------------|
| Joseph et al. <sup>1</sup>    | Melanoma                                                                                               | anti-PD-1                                           | 3                                   | 3                                             | N/A <sup>a</sup>                           | <ul style="list-style-type: none"> <li>▪ Diffuse CD3+ lymphocytes (CD4&gt;CD8)</li> <li>▪ 10-20% PD-1+ T cells</li> </ul>                                                                                                                                                                 |
| Schaberg et al. <sup>2</sup>  | Melanoma, lung, urothelial, HNSCC                                                                      | anti-PD-1<br>anti-PD-L1                             | 5                                   | 5                                             | N/A <sup>a</sup>                           | <ul style="list-style-type: none"> <li>▪ Significantly greater CD163+ infiltrates, increased spongiosis, and epidermal necrosis when compared to idiopathic LP and LP-like keratosis</li> <li>▪ No difference in CD3, CD4:CD8 ratio, PD-1, PD-L1, CD20, CD25, Foxp3, or CXCL13</li> </ul> |
| Hwang et al. <sup>3</sup>     | Melanoma                                                                                               | anti-PD-1                                           | 40                                  | 16 (from 10 patients with lichenoid reaction) | N/A <sup>a</sup>                           | None                                                                                                                                                                                                                                                                                      |
| Shi et al. <sup>4</sup>       | Melanoma, lung, RCC                                                                                    | anti-PD-1<br>anti-PD-L1<br>anti-PD-1<br>anti-CTLA-4 | 20                                  | 17                                            | 16/17 (94%)                                | <ul style="list-style-type: none"> <li>▪ CD3+, CD4+ CD8+ CD20- (3 patients)</li> </ul>                                                                                                                                                                                                    |
| Belum et al. <sup>5</sup>     | Melanoma, lung, urothelial, astrocytoma, breast, multiple myeloma, MALT lymphoma, B-cell lymphoma, CLL | anti-PD-1                                           | 14                                  | 13                                            | 7/13 (54%) <sup>b</sup>                    | None                                                                                                                                                                                                                                                                                      |
| Goldinger et al. <sup>6</sup> | Melanoma                                                                                               | anti-PD-1                                           | 15                                  | 12 (from 8 patients)                          | 10/12 (83%)                                | <ul style="list-style-type: none"> <li>▪ CD8+ accumulation at the DEJ and CD8+ exocytosis in the epidermis, keratinocyte apoptosis (6 patients)</li> <li>▪ PD-1+ infiltrating T cells and keratinocytes, PD-L1+ keratinocytes (1 patient, later time course)</li> </ul>                   |
| Chou et al. <sup>7</sup>      | Melanoma, lung, RCC                                                                                    | anti-PD-1<br>anti-PD-1 +<br>anti-CTLA-4             | 22                                  | 29                                            | N/A <sup>a</sup>                           | None                                                                                                                                                                                                                                                                                      |
| Tetzlaff et al. <sup>8</sup>  | Melanoma, lung                                                                                         | Anti-PD-1                                           | 3                                   | 5                                             | N/A <sup>a</sup>                           | None                                                                                                                                                                                                                                                                                      |

Abbreviations: CTLA-4, cytotoxic T lymphocyte associated antigen 4; CLL, chronic lymphocytic leukemia; DEJ, dermal-epidermal junction; HNSCC, head and neck squamous cell carcinoma; irAE, immune-related adverse event; LP, lichen planus; MALT, mucosa associated lymphoid tissue; N/A, not applicable; PD-1, programmed cell death protein 1; PD-L1, PD1 ligand; RCC, renal cell carcinoma

Legend:

<sup>a</sup>Proportions were not calculated for specimen cohorts that were comprised solely of lichenoid eruptions

<sup>b</sup>Excluding 3 specimens with interface dermatitis

**Supplemental Figure 1.** The lichenoid reaction pattern is characterized by a band of lymphocytes abutting the dermal-epidermal junction and destruction of the basal layer of keratinocytes.

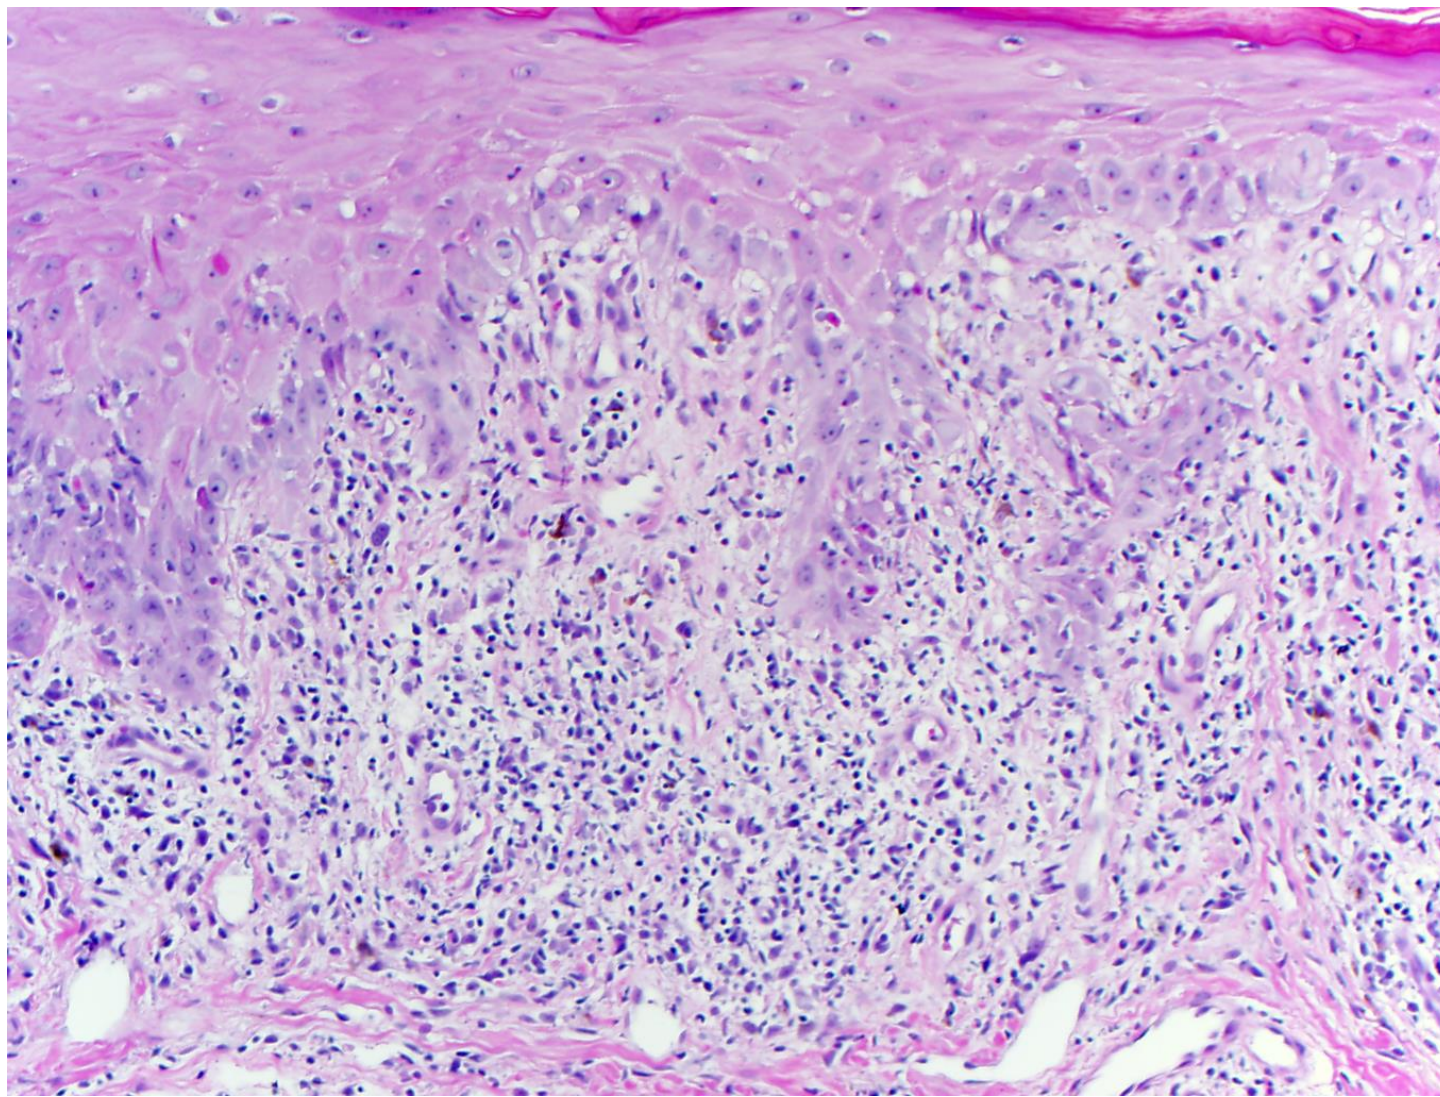

## Supplemental References

1. Joseph RW, Cappel M, Goedjen B, et al. Lichenoid dermatitis in three patients with metastatic melanoma treated with anti-PD-1 therapy. *Cancer Immunol Res.* 2015;3(1):18-22.
2. Schaberg KB, Novoa RA, Wakelee HA, et al. Immunohistochemical analysis of lichenoid reactions in patients treated with anti-PD-L1 and anti-PD-1 therapy. *J Cutan Pathol.* 2016;43(4):339-346.
3. Hwang SJ, Carlos G, Wakade D, et al. Cutaneous adverse events (AEs) of anti-programmed cell death (PD)-1 therapy in patients with metastatic melanoma: A single-institution cohort. *J Am Acad Dermatol.* 2016;74(3):455-461 e451.
4. Shi VJ, Rodic N, Gettinger S, et al. Clinical and Histologic Features of Lichenoid Mucocutaneous Eruptions Due to Anti-Programmed Cell Death 1 and Anti-Programmed Cell Death Ligand 1 Immunotherapy. *JAMA Dermatol.* 2016.
5. Belum VR, Benhuri B, Postow MA, et al. Characterisation and management of dermatologic adverse events to agents targeting the PD-1 receptor. *Eur J Cancer.* 2016;60:12-25.
6. Goldinger SM, Stieger P, Meier B, et al. Cytotoxic Cutaneous Adverse Drug Reactions during Anti-PD-1 Therapy. *Clin Cancer Res.* 2016;22(16):4023-4029.
7. Chou S, Hwang SJ, Carlos G, Wakade D, Fernandez-Penas P. Histologic Assessment of Lichenoid Dermatitis Observed in Patients With Advanced Malignancies on Antiprogramed Cell Death-1 (anti-PD-1) Therapy With or Without Ipilimumab. *Am J Dermatopathol.* 2017;39(1):23-27.
8. Tetzlaff MT, Nagarajan P, Chon S, et al. Lichenoid Dermatologic Toxicity From Immune Checkpoint Blockade Therapy: A Detailed Examination of the Clinicopathologic Features. *Am J Dermatopathol.* 2017;39(2):121-129.
